# Supplementary material for: Giant {Mo132} polyoxometalate isolated with diverse organic cations: a systematic proton conductivity study
Source: Royal Society of Chemistry journal article supplement (doi:10.1039/d4dt02834a), 2024-12-13
Supplement: d4dt02834a1.pdf [file d4dt02834a1.pdf]

# Electronic Supplementary Information (ESI)

## Giant {Mo<sub>132</sub>}-polyoxometalate isolated with diverse organic cations: a systematic proton conductivity study

Parvathy M. Unnikrishnan,<sup>†</sup> Olivia Basu,<sup>†</sup> Rajendar Nasani, Samar K. Das\*

School of Chemistry, University of Hyderabad, Hyderabad – 500046, India

\*Email: [skdas@uohyd.ac.in](mailto:skdas@uohyd.ac.in), [samar439@gmail.com](mailto:samar439@gmail.com)

<sup>†</sup> These authors contributed equally

### Table of contents

| Sections                                                             | Details                                                                                                                     | Page No. |
|----------------------------------------------------------------------|-----------------------------------------------------------------------------------------------------------------------------|----------|
| S1                                                                   | Experimental procedures                                                                                                     | S2       |
| S2                                                                   | Results and discussion                                                                                                      | S3       |
|                                                                      | S2.1. FT-IR spectrum of methyl viologen                                                                                     | S3       |
|                                                                      | S2.2. LC-MS data of methyl viologen                                                                                         | S3       |
|                                                                      | S2.3. Unit cell parameters                                                                                                  | S4       |
|                                                                      | S2.4. PXRD analysis                                                                                                         | S4       |
|                                                                      | S2.5 Morphology of {Mo <sub>132</sub> }                                                                                     | S5       |
|                                                                      | S2.6 FT-IR spectra of Mo <sub>132</sub> products                                                                            | S6       |
|                                                                      | S2.7. UV-Visible spectroscopic analysis                                                                                     | S7       |
|                                                                      | S2.8 XPS analysis                                                                                                           | S8-S9    |
|                                                                      | S2.9 Thermogravimetric analysis                                                                                             | S9       |
|                                                                      | S2.10. ICP-OES analysis and calculations                                                                                    | S10      |
|                                                                      | S2.11. CHN analysis and calculations                                                                                        | S10-S14  |
|                                                                      | S2.12. Proton conductivity studies                                                                                          | S15-S21  |
|                                                                      | S2.13 Cubic unit cell packing of {Mo <sub>132</sub> }                                                                       | S22      |
|                                                                      | S2.13. Dynamic Vapor sorption studies                                                                                       | S23      |
|                                                                      | S2.14. Stability check after impedance measurements: Powder X ray diffraction and Fourier transformed infrared spectroscopy | S24-S25  |
| S2.15. Electrical conductivity study                                 | S25-S27                                                                                                                     |          |
| S2.16. Comparison of proton conductivity of previously reported POMs | S28                                                                                                                         |          |
|                                                                      | References                                                                                                                  |          |

## Section S1. Experimental procedures

### Chemicals

All chemicals were used as it is without any additional purification. Ammonium molybdate tetrahydrate ((NH<sub>4</sub>)<sub>6</sub>Mo<sub>7</sub>O<sub>24</sub>·4H<sub>2</sub>O), ammonium acetate (CH<sub>3</sub>COONH<sub>4</sub>), hydrazine sulphate (N<sub>2</sub>H<sub>4</sub>·H<sub>2</sub>SO<sub>4</sub>) and glacial acetic acid (CH<sub>3</sub>COOH) were purchased from SRL chemicals. L- histidine (C<sub>6</sub>H<sub>9</sub>N<sub>3</sub>O<sub>2</sub>) and 4,4'-bipyridyl (C<sub>10</sub>H<sub>8</sub>N<sub>2</sub>) were procured from TCI chemicals. Iodomethane (CH<sub>3</sub>I) was purchased from Sigma Aldrich; pyridine (C<sub>5</sub>H<sub>5</sub>N), ethyl acetate (C<sub>4</sub>H<sub>8</sub>O<sub>2</sub>) and acetonitrile (CH<sub>3</sub>CN) from FINAR chemicals.

### Synthesis of {Mo<sub>132</sub>}

{Mo<sub>132</sub>}: (NH<sub>4</sub>)<sub>42</sub> [Mo<sup>VI</sup><sub>72</sub>Mo<sup>V</sup><sub>60</sub>O<sub>372</sub>(CH<sub>3</sub>COO)<sub>30</sub>(H<sub>2</sub>O)<sub>72</sub>] ca. 300 H<sub>2</sub>O ca. 10 CH<sub>3</sub>COONH<sub>4</sub>

{Mo<sub>132</sub>} was synthesised following a previous literature<sup>1</sup>. 5.6 g ammonium molybdate (4.5 mmol) was dissolved in 250 ml water. To this, 12.5 g of ammonium acetate (162.2 mmol) was added while stirring, followed by the addition of 0.8 g of hydrazine sulphate (6.1 mmol). At this point, the colour of the solution turned pale green, which then turned to blue, and the blue colour deepened with time. After 10 minutes 83 ml of 50% glacial acetic acid was added to the reaction mixture and stirred for another 20 minutes. This reaction mixture was then kept in rest at 22 °C for four days. Dark brown crystals of {Mo<sub>132</sub>} were filtered, washed with ethanol and diethyl ether, and dried in air.

### Synthesis of Methyl viologen (MV<sup>2+</sup>)

Orange-red colored crystalline methyl viologen (MV<sup>2+</sup>) was synthesized following a previously reported procedure<sup>2</sup>. Iodomethane (3.5 g, 0.025 mol) was added dropwise to a solution of 4,4'-Bipyridine (1.56 g, 0.01 mol) and acetonitrile (100 ml), while stirring. The reaction contents were refluxed for 24 hours, and ethyl acetate (100 ml) was added after the reaction mixture cooled down to room temperature. The precipitate was filtered, followed by washing with ethyl acetate. Yield: ca. 3.82g, 87%; product analyzed by LC-MS (186.05 [M]<sup>+</sup>, 93.1 [M/2]<sup>+</sup> and FT-IR spectroscopy.

For the synthesis of **His-Mo<sub>132</sub>**, **Bpy-Mo<sub>132</sub>**, and **MV-Mo<sub>132</sub>**, the amount of corresponding organic cations used, that is, histidine (1.5 mmol), bipyridine (1.5 mmol), and methyl viologen (0.75mmol), is less than the amount of pyridine used for the synthesis of corresponding ion-exchanged product **Py-Mo<sub>132</sub>**, since the solubility of pyridinium ion is higher than the rest of the organic cations used, and all else attained saturation at lower quantity.

## Section S2. Results and discussion

### Section S2.1. Fourier transformed Infrared spectrum of MV<sup>2+</sup>

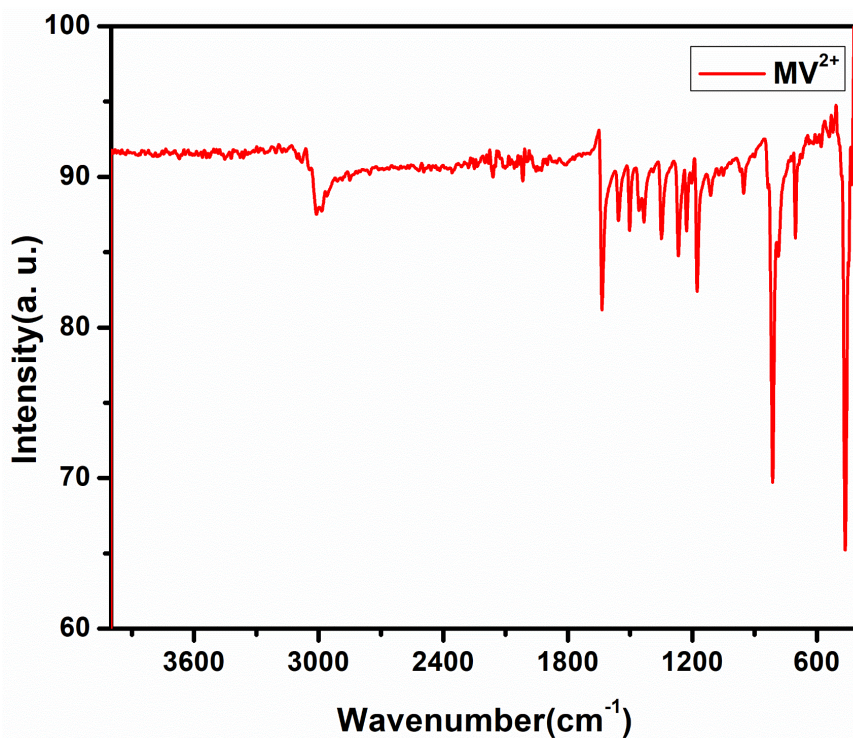

Fig S1. FT-IR spectrum of methyl viologen

### Section S2.2. Liquid Chromatography-Mass spectrometric analysis of Methyl viologen

#### LCMS-8040 DATA REPORT SHIMADZU

Sample Information  
Sample Name : NR-VIOL-2  
Injection Volume : 1  
Method File : 170919-MASTER METHOD-Q1.lcm  
Data File : D:\LCMS8040\SKD\NR17082021-NR-VIOL-2-ESI-001.lcd

R Time ----(Scan#----)  
MassPeaks 14 BasePeak 186.050(10259982)  
Spectrum Mode: Averaged 0.222-0.545(63-153)  
BG Mode: Averaged 0.050-0.057(15-17) Polarity: Positive Segment 1 - Event 1

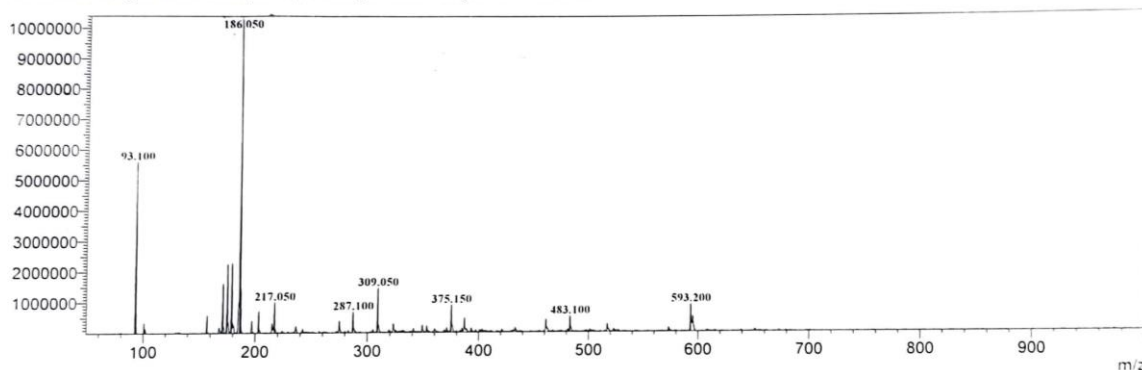

Fig S2. LC-MS data of methyl viologen



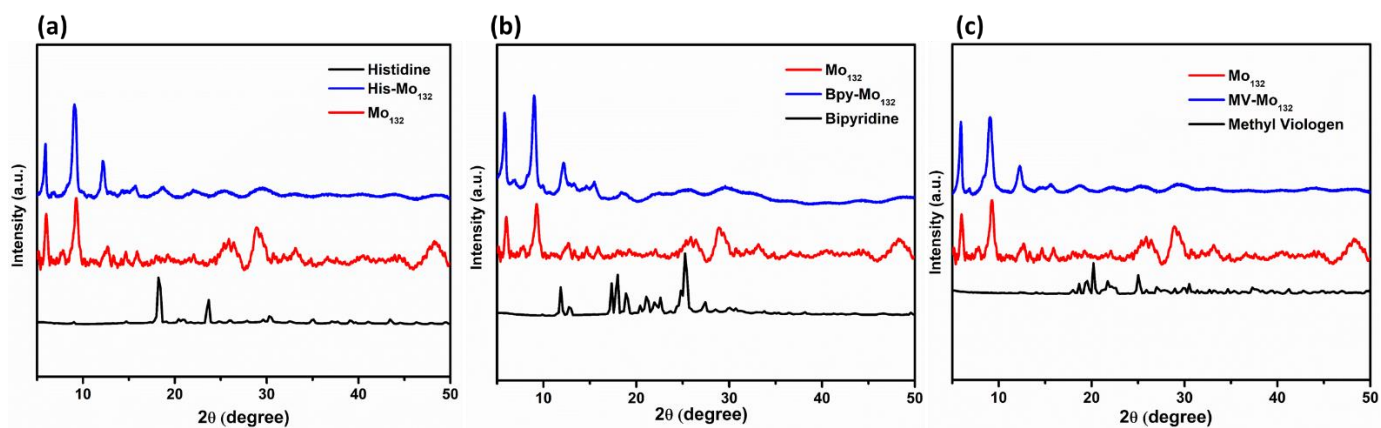

**Fig S4.** Comparison of the PXRD patterns of (a) His-Mo<sub>132</sub>, (b) Bpy-Mo<sub>132</sub>, and (c) MV-Mo<sub>132</sub>, with the pristine Mo<sub>132</sub> and respective organic molecules.

### Section S2.5. Morphology of {Mo<sub>132</sub>}

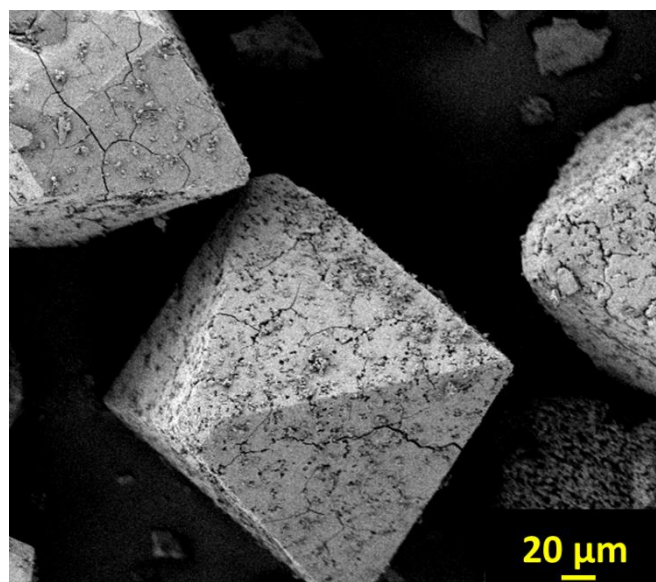

**Fig S5.** FESEM image of synthesized {Mo<sub>132</sub>}

## Section S2.6. Fourier Transformed Infrared spectroscopic analysis

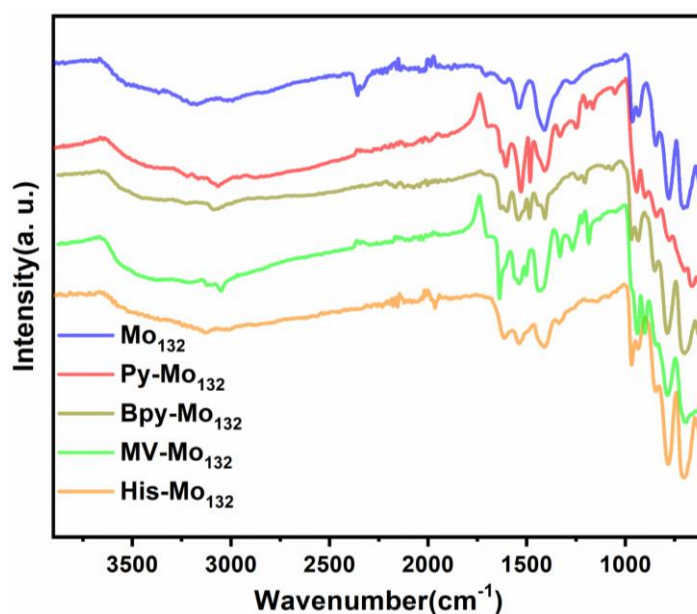

Fig S6. Infrared spectra of  $\{Mo_{132}\}$ ,  $His-Mo_{132}$ ,  $Py-Mo_{132}$ ,  $Bpy-Mo_{132}$ , and  $MV-Mo_{132}$

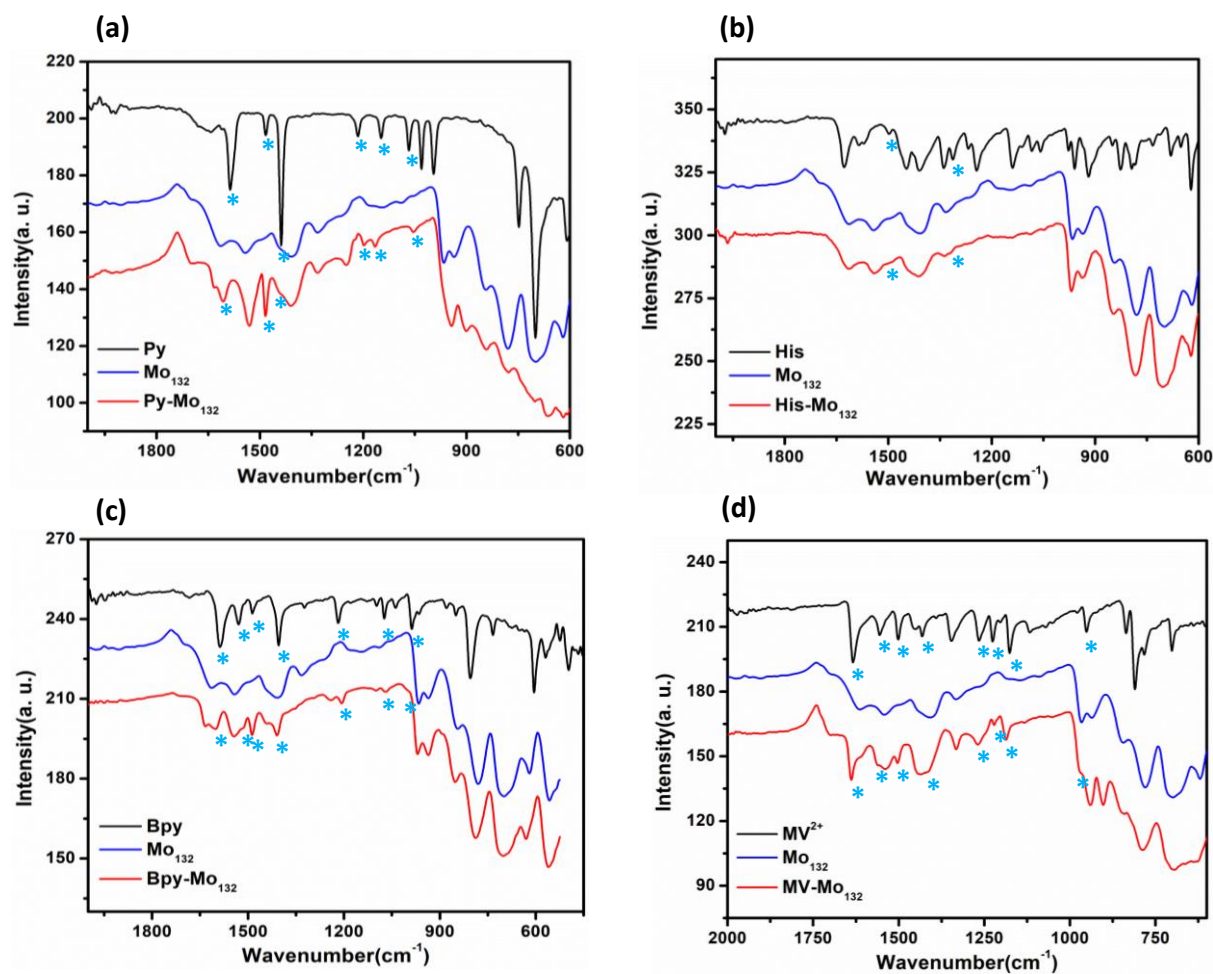

Fig S7. IR spectra of (a)  $Py-Mo_{132}$ , (b)  $His-Mo_{132}$ , (c)  $Bpy-Mo_{132}$ , (d)  $MV-Mo_{132}$  in comparison with their respective pristine organic molecules and  $\{Mo_{132}\}$ .



Extra peaks in the product caused by organic cations are shown with an asterisk in the figure S5. Each product exhibits peaks corresponding to organic salts, such as the N-H bending mode of aromatic secondary amine at  $1480\text{ cm}^{-1}$ , C-N stretching at  $1250\text{ cm}^{-1}$ , aromatic C=C ring stretching in the range of  $1600\text{ cm}^{-1}$ , -C-H aromatic out of plane bending at  $980\text{ cm}^{-1}$ . These results demonstrate that these materials are not a composite with pristine  $\{\text{Mo}_{132}\}$

### Section S2.7. UV-Visible absorption spectroscopic analysis

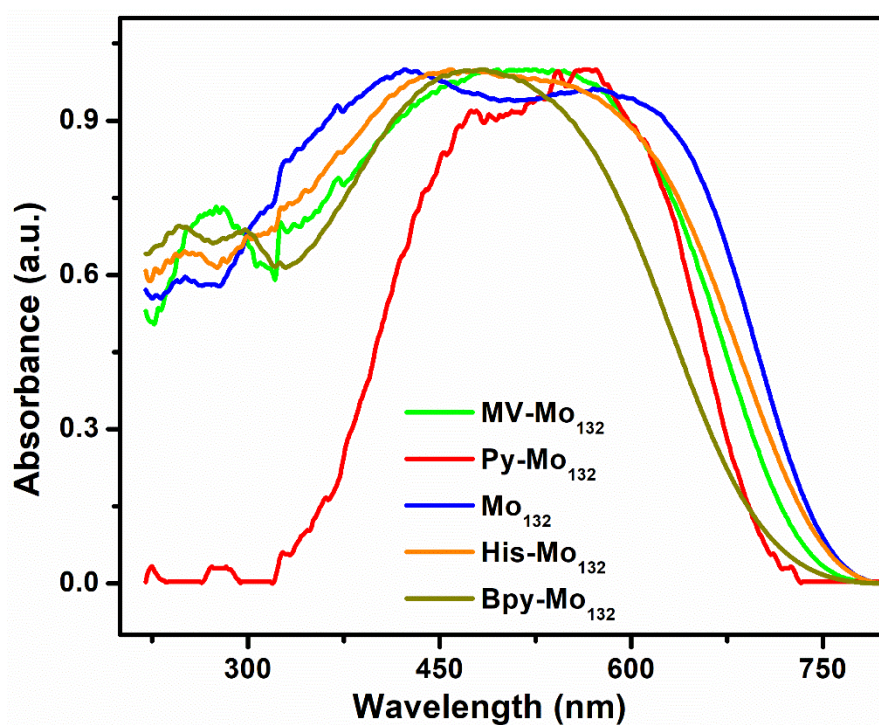

**Fig S8.** Kubelka-Munk transformed absorption spectra of  $\{\text{Mo}_{132}\}$ ,  $\text{His-Mo}_{132}$ ,  $\text{Py-Mo}_{132}$ ,  $\text{Bpy-Mo}_{132}$ , and  $\text{MV-Mo}_{132}$ .

Section S2.8. X-ray photoelectron spectroscopic analysis.

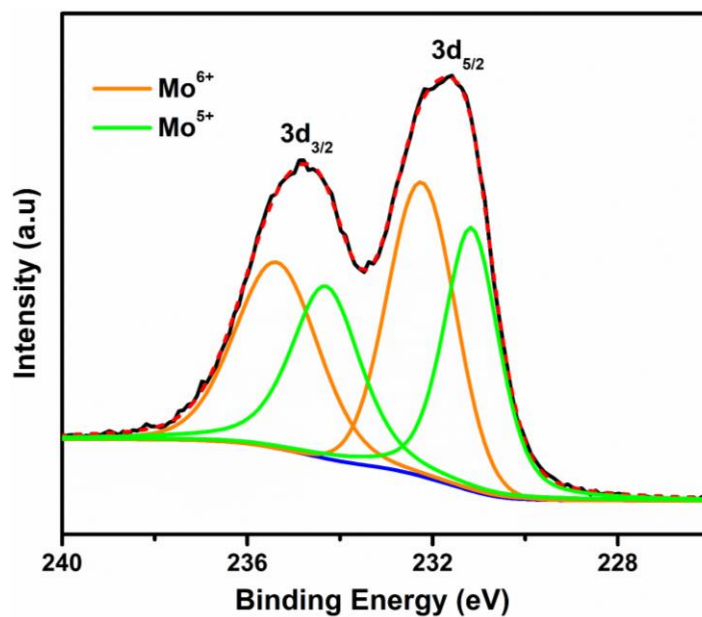

Fig S9. XPS spectrum of His-Mo<sub>132</sub>.

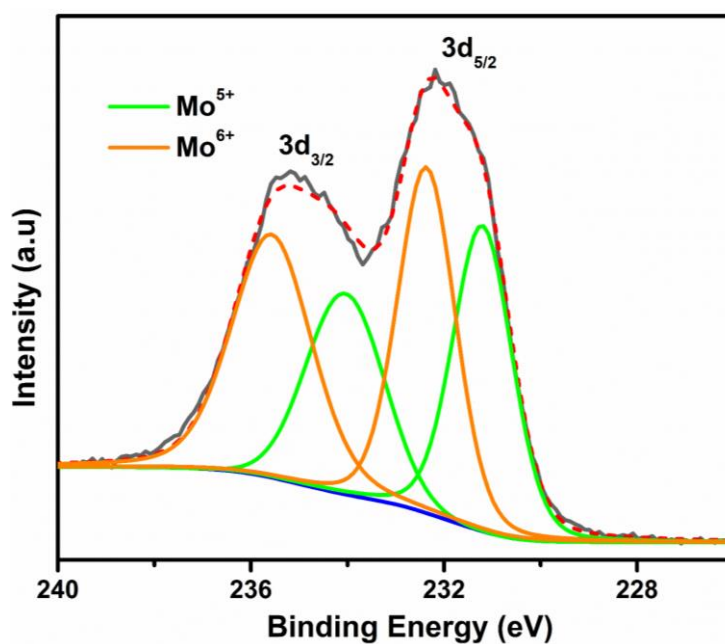

Fig S10. XPS spectrum of MV-Mo<sub>132</sub>.



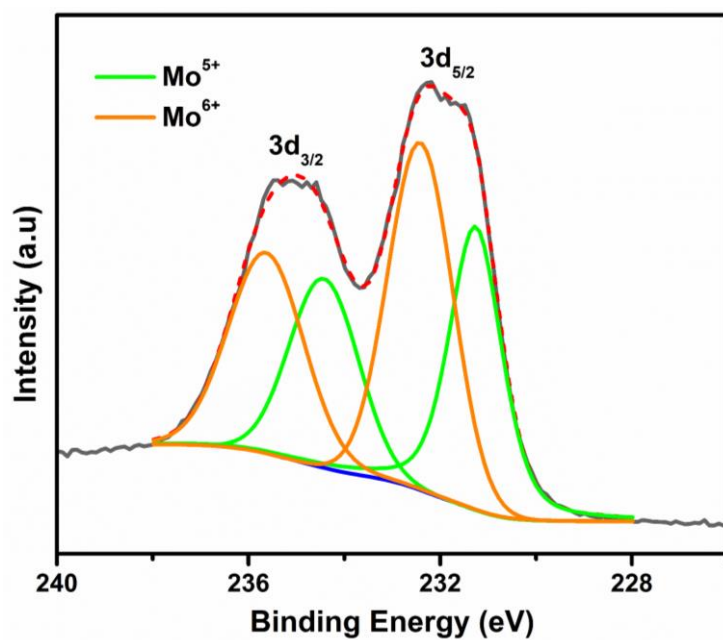

Fig S11. XPS spectrum of Bpy-Mo<sub>132</sub>.

### Section S2.9. Thermogravimetric analysis

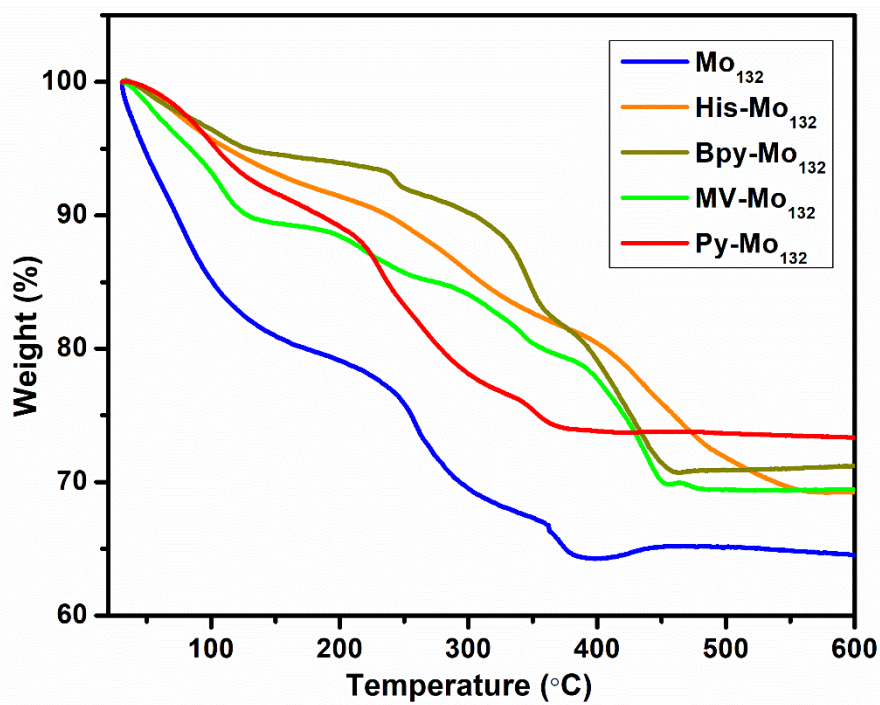

Fig S12. TGA of {Mo<sub>132</sub>}, His-Mo<sub>132</sub>, Py-Mo<sub>132</sub>, Bpy-Mo<sub>132</sub>, and MV-Mo<sub>132</sub>.

## Section S2.10. ICP-OES elemental analysis

The number of respective organic cations present in **His-Mo<sub>132</sub>**, **Py-Mo<sub>132</sub>**, **Bpy-Mo<sub>132</sub>**, and **MV-Mo<sub>132</sub>**, were calculated from CHN and ICP-OES elemental analysis; the calculations of which are provided below.

**Table S1. Result of ICP-OES analysis for Mo.**

| Compounds                   | Sample provided (mg) | Concentration (ppm) |
|-----------------------------|----------------------|---------------------|
| <b>Bpy-Mo<sub>132</sub></b> | 13.1                 | 155.2               |
| <b>Py-Mo<sub>132</sub></b>  | 13.6                 | 180                 |
| <b>His-Mo<sub>132</sub></b> | 13.8                 | 164.2               |
| <b>MV-Mo<sub>132</sub></b>  | 13.4                 | 175.7               |

### Calculation of amount of Mo in each sample

Molar mass of Molybdenum = 95.95

For **Bpy-Mo<sub>132</sub>**, number of moles of Mo in the analyzed sample solution =  $1.617 \times 10^{-3}$  in 1 L

The sample was provided in 4 ml HCl, which then diluted 10 times before analysis.

Thus, in 40 ml of the sample, number of moles of Mo =  $6.470 \times 10^{-5}$

Mass of Mo in 100 g of **Bpy-Mo<sub>132</sub>** sample = 47 g

Similarly calculated for other samples as well and obtained as 52 g Mo in **Py-Mo<sub>132</sub>**, 52.4 g Mo in **MV-Mo<sub>132</sub>** and 47.5 g of Mo in **His-Mo<sub>132</sub>**.

| SOPHISTICATED ANALYTICAL INSTRUMENT FACILITY<br>IIT MADRAS, CHENNAI-36<br>PERKIN ELMER OPTIMA 5300 DV ICP-OES |                                    |                 |                                             |
|---------------------------------------------------------------------------------------------------------------|------------------------------------|-----------------|---------------------------------------------|
| Sample code                                                                                                   | Element symbol and Wavelength (nm) | Dilution Factor | Concn.in ppm $\mu\text{g/ml}$ (or) mg/litre |
| 1                                                                                                             | Mo 202.031                         | 10              | 155.2 mg/L                                  |
| 2                                                                                                             | Mo 202.031                         | 10              | 163.1 mg/L                                  |
| 3                                                                                                             | Mo 202.031                         | 10              | 180.0 mg/L                                  |
| 4                                                                                                             | Mo 202.031                         | 10              | 164.2 mg/L                                  |
| 5                                                                                                             | Mo 202.031                         | 10              | 175.7 mg/L                                  |

**Fig S13.** Inductively coupled plasma (ICP-OES) analysis of **His-Mo<sub>132</sub>**, **Py-Mo<sub>132</sub>**, **Bpy-Mo<sub>132</sub>**, and **MV-Mo<sub>132</sub>** and {Mo<sub>132</sub>}

## Section S2.11. CHN elemental analysis

Table S2. Result of CHN analysis.

| Compounds             | C (%) |
|-----------------------|-------|
| His-Mo <sub>132</sub> | 10.08 |
| Py-Mo <sub>132</sub>  | 9.80  |
| Bpy-Mo <sub>132</sub> | 13.79 |
| MV-Mo <sub>132</sub>  | 11.01 |
| {Mo <sub>132</sub> }  | 4.33  |

The molecular formula of all products according to the CHN and ICP analysis are as follows

- **Py-Mo<sub>132</sub>**: (NH<sub>4</sub>)<sub>13</sub>(PyH)<sub>29</sub>[Mo<sup>VI</sup><sub>72</sub>Mo<sup>V</sup><sub>60</sub>O<sub>372</sub>(CH<sub>3</sub>COO)<sub>30</sub>(H<sub>2</sub>O)<sub>72</sub>]·67H<sub>2</sub>O·10CH<sub>3</sub>COONH<sub>4</sub>
- **His-Mo<sub>132</sub>**: (NH<sub>4</sub>)<sub>20</sub>(HisH)<sub>22</sub>[Mo<sup>VI</sup><sub>72</sub>Mo<sup>V</sup><sub>60</sub>O<sub>372</sub>(CH<sub>3</sub>COO)<sub>30</sub>(H<sub>2</sub>O)<sub>72</sub>]·110H<sub>2</sub>O·10CH<sub>3</sub>COONH<sub>4</sub>
- **Bpy-Mo<sub>132</sub>**:  
(NH<sub>4</sub>)<sub>18</sub>(BpyH)<sub>24</sub>[Mo<sup>VI</sup><sub>72</sub>Mo<sup>V</sup><sub>60</sub>O<sub>372</sub>(CH<sub>3</sub>COO)<sub>30</sub>(H<sub>2</sub>O)<sub>72</sub>]·128H<sub>2</sub>O·10CH<sub>3</sub>COONH<sub>4</sub>
- **MV-Mo<sub>132</sub>**: (NH<sub>4</sub>)<sub>14</sub>(MV)<sub>14</sub>[Mo<sup>VI</sup><sub>72</sub>Mo<sup>V</sup><sub>60</sub>O<sub>372</sub>(CH<sub>3</sub>COO)<sub>30</sub>(H<sub>2</sub>O)<sub>72</sub>]·84H<sub>2</sub>O·10CH<sub>3</sub>COONH<sub>4</sub>

analytic functional testing  
 varioMICRO CHNS PV  
 serial number: 15181026

Graphic report

| No. | Name     | N [%] | C [%] | H [%] | S [%] | Date     | Time     |
|-----|----------|-------|-------|-------|-------|----------|----------|
| 19  | UP-M0132 | 2.84  | 4.33  | 3.120 | 0.158 | 14-08-24 | 03:15 PM |

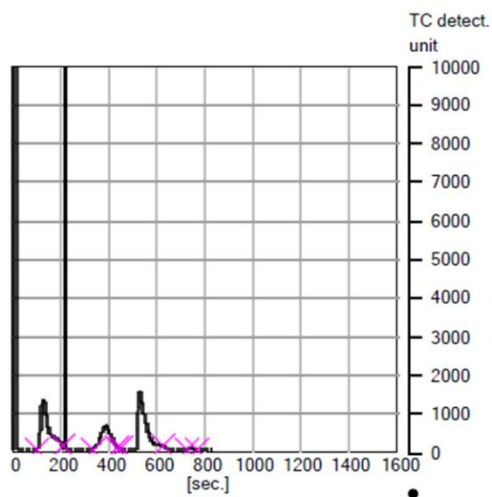

Fig S14. CHN data of {M0132}.

| No. | Name  | N [%] | C [%] | H [%] | S [%] | Date     | Time     |
|-----|-------|-------|-------|-------|-------|----------|----------|
| 22  | UP-PY | 1.63  | 9.80  | 2.696 | 0.091 | 14-08-24 | 03:58 PM |

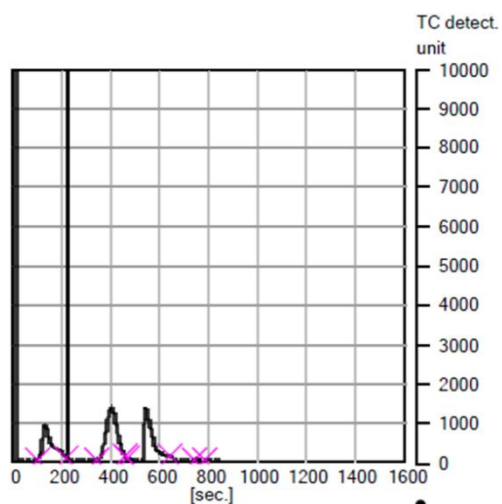

Fig S15. CHN data of Py-M0132.

| No. | Name   | N [%] | C [%] | H [%] | S [%] | Date     | Time     |
|-----|--------|-------|-------|-------|-------|----------|----------|
| 23  | UP-HIS | 4.42  | 10.08 | 2.698 | 0.055 | 14-08-24 | 04:12 PM |

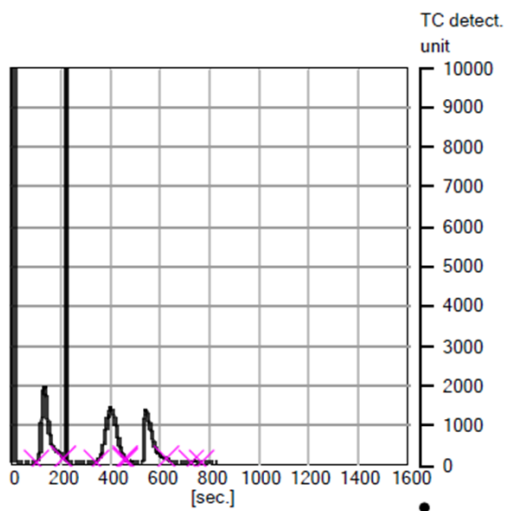

**Fig S16.** CHN data of **His-Mo<sub>132</sub>**.

| No. | Name  | N [%] | C [%] | H [%] | S [%] | Date     | Time     |
|-----|-------|-------|-------|-------|-------|----------|----------|
| 20  | UP-MV | 1.70  | 11.01 | 2.865 | 0.119 | 14-08-24 | 03:29 PM |

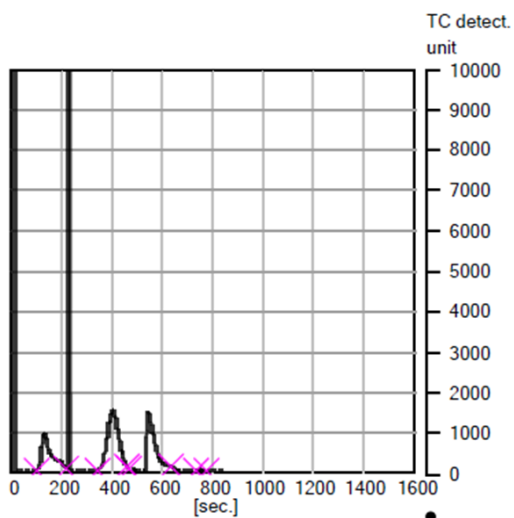

**Fig S17.** CHN data of **MV-Mo<sub>132</sub>**.

| No. | Name   | N [%] | C [%] | H [%] | S [%] | Date     | Time     |
|-----|--------|-------|-------|-------|-------|----------|----------|
| 21  | UP-BPY | 3.02  | 13.79 | 2.634 | 0.080 | 14-08-24 | 03:44 PM |

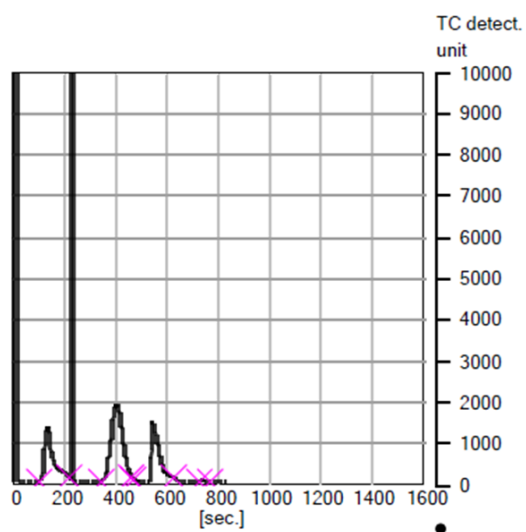

Fig S18. CHN data of **Bpy-Mo<sub>132</sub>**.



## Section S2.12. Proton conductivity studies

### Py-Mo<sub>132</sub>

Table S3. Proton conductivity values of Py-Mo<sub>132</sub> at different temperatures.

| Temperature (°C) | Conductivity (Scm <sup>-1</sup> ) |
|------------------|-----------------------------------|
| 35               | 0.003                             |
| 40               | 0.004                             |
| 50               | 0.0051                            |
| 60               | 0.0068                            |
| 70               | 0.0083                            |
| 80               | 0.0107                            |

Table S4. Proton conductivity values of Py-Mo<sub>132</sub> at 45 °C and different relative humidity.

| Relative humidity (%) | Conductivity (Scm <sup>-1</sup> ) |
|-----------------------|-----------------------------------|
| 98                    | 0.0063                            |
| 90                    | 0.0059                            |
| 85                    | 0.0051                            |
| 80                    | 0.0049                            |
| 75                    | 0.0047                            |
| 70                    | 0.0044                            |

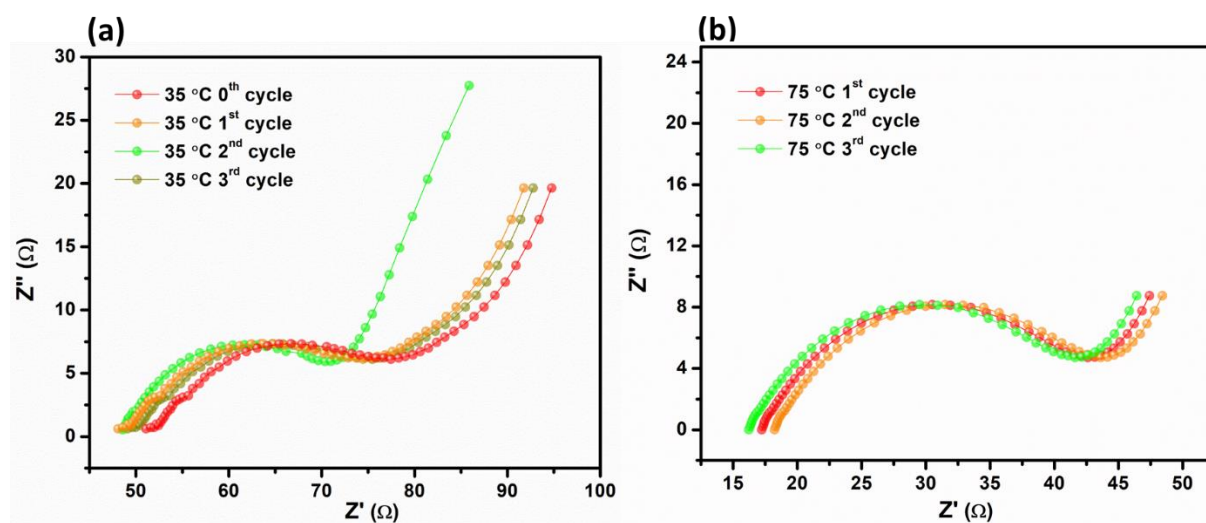

Fig S19. Nyquist plots for Py-Mo<sub>132</sub> at constant relative humidity of 98% and (a) at 35 °C and (b) at 75 °C.

## His-Mo<sub>132</sub>

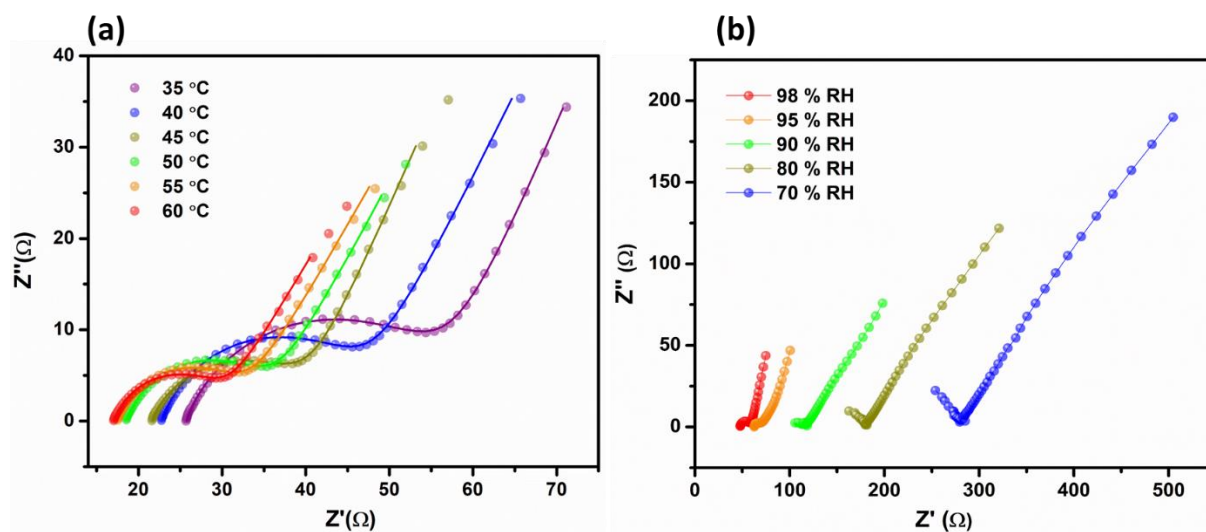

**Fig S20.** Nyquist plots for **His-Mo<sub>132</sub>** at (a) 98% RH and different temperatures; (b) at 45 °C and different RH. The solid line represents the fitted data, and the points denote the experimental data.

**Table S5.** Proton conductivity values of **His-Mo<sub>132</sub>** at different temperatures.

| Temperature (°C) | Conductivity (Scm <sup>-1</sup> ) |
|------------------|-----------------------------------|
| 35               | 0.0044                            |
| 40               | 0.0050                            |
| 45               | 0.00528                           |
| 50               | 0.00611                           |
| 55               | 0.00653                           |
| 60               | 0.00669                           |

**Table S6.** Proton conductivity values of **His-Mo<sub>132</sub>** at 45 °C and different relative humidity.

| Relative Humidity (%) | Conductivity (Scm <sup>-1</sup> ) |
|-----------------------|-----------------------------------|
| 98                    | 0.0032                            |
| 95                    | 0.0024                            |
| 90                    | 0.0015                            |
| 80                    | 0.0009                            |
| 70                    | 0.0006                            |

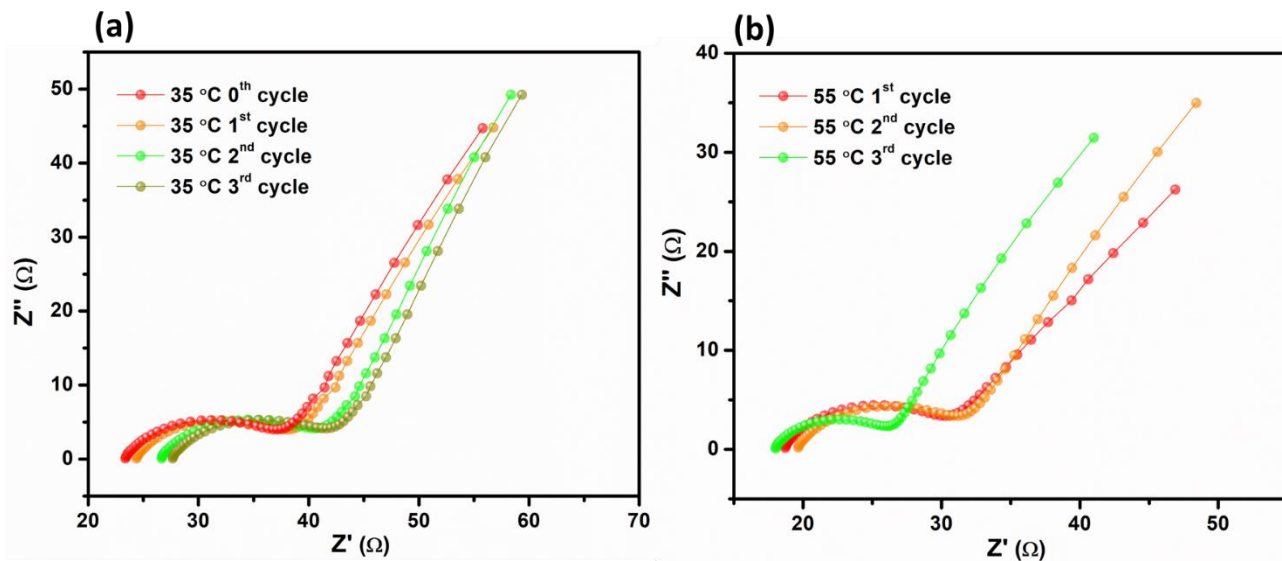

Fig S21. Nyquist plots for **His-Mo<sub>132</sub>** at constant relative humidity of 98% and (a) at 35 °C (b) and at 55 °C.

### Bpy-Mo<sub>132</sub>

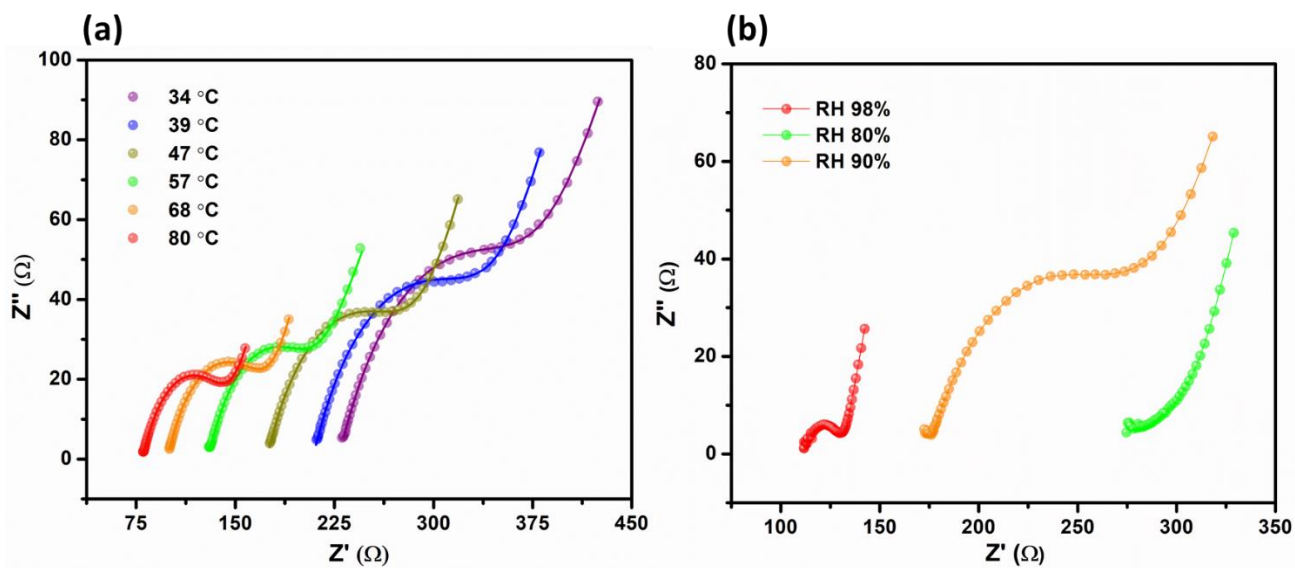

Fig S22. Nyquist plots for **Bpy-Mo<sub>132</sub>** (a) at 98% RH and different temperatures; (b) at 45 °C and different RH. The solid line represents the fitted data, and the points denote the experimental data.

**Table S7. Proton conductivity values of Bpy-Mo<sub>132</sub> at different temperatures.**

| Temperature (°C) | Conductivity (Scm <sup>-1</sup> ) |
|------------------|-----------------------------------|
| 34               | 0.00070                           |
| 39               | 0.000769                          |
| 47               | 0.00095                           |
| 57               | 0.00122                           |
| 68               | 0.00168                           |
| 78               | 0.002                             |

**Table S8. Proton conductivity values of Bpy-Mo<sub>132</sub> at 50 °C and different relative humidity.**

| Relative Humidity (%) | Conductivity (Scm <sup>-1</sup> ) |
|-----------------------|-----------------------------------|
| 98                    | 0.0013                            |
| 90                    | 0.00085                           |
| 80                    | 0.0006                            |

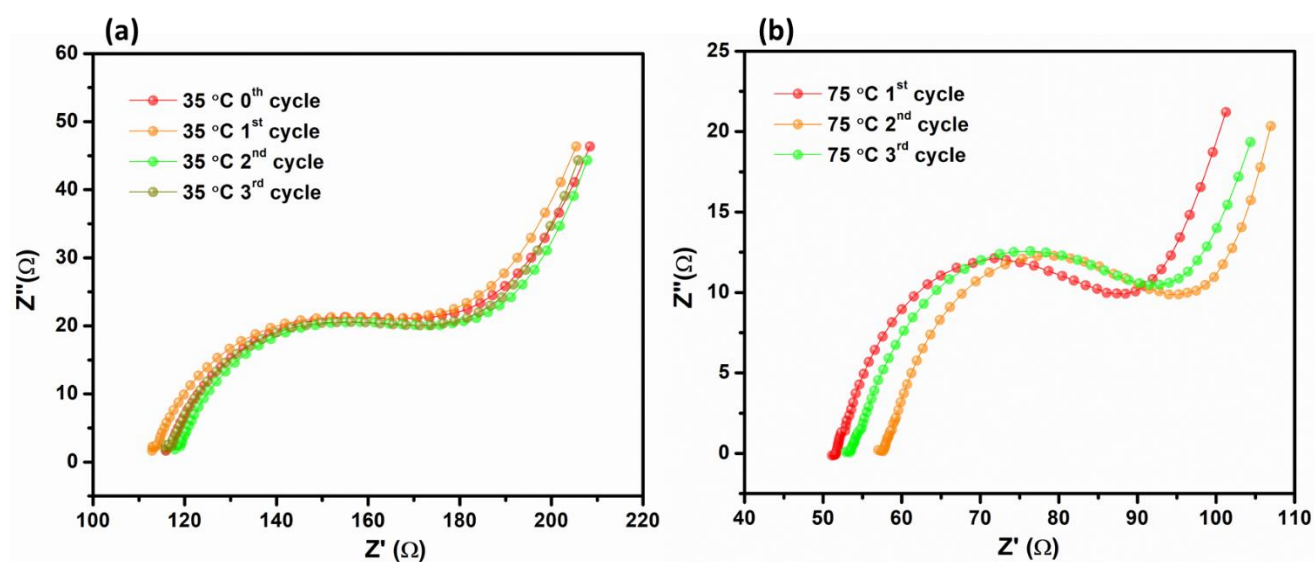

**Fig S23.** Nyquist plots for **Bpy-Mo<sub>132</sub>** at constant relative humidity of 98% and (a) at 35 °C (b) and at 75 °C.

MV-Mo<sub>132</sub>

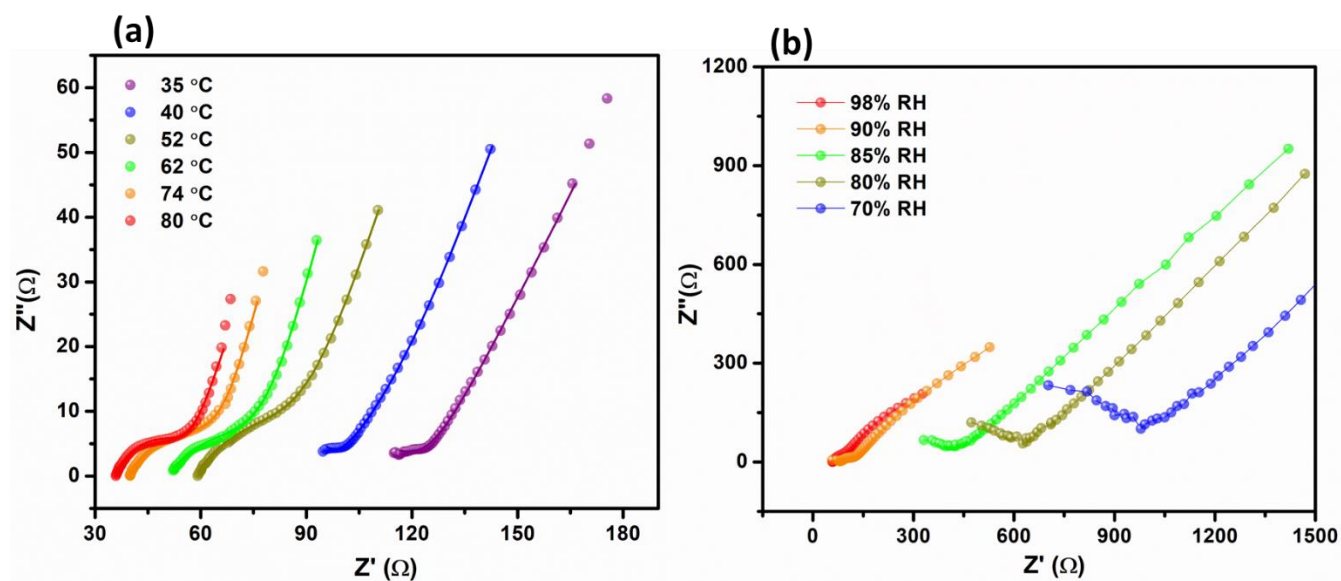

**Fig S24.** Nyquist plots for MV-Mo<sub>132</sub> at (a) 98% RH and different temperatures; (b) at 45 °C and different RH. The solid line represents the fitted data, and the points denote the experimental data.

**Table S9.** The proton conductivity values of MV-Mo<sub>132</sub> at different temperatures.

| Temperature (°C) | Conductivity (Scm <sup>-1</sup> ) |
|------------------|-----------------------------------|
| 35               | 0.0012                            |
| 40               | 0.00142                           |
| 52               | 0.00219                           |
| 62               | 0.00272                           |
| 74               | 0.00349                           |
| 81               | 0.00389                           |

**Table S10.** Proton conductivity values of MV-Mo<sub>132</sub> at 50 °C and different relative humidity.

| Relative Humidity (%) | Conductivity (Scm <sup>-1</sup> ) |
|-----------------------|-----------------------------------|
| 98                    | 0.0026                            |
| 90                    | 0.0016                            |
| 85                    | 0.00046                           |
| 80.                   | 0.00032                           |
| 75                    | 0.00025                           |

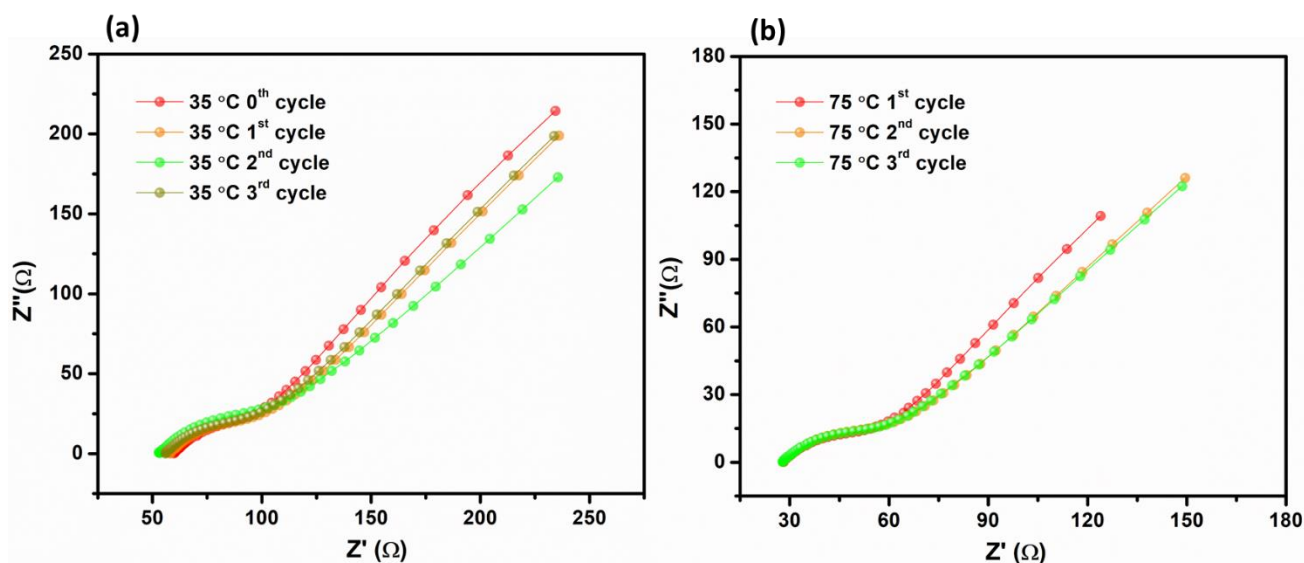

**Fig S25.** Nyquist plots for MV-Mo<sub>132</sub> at constant relative humidity of 98% and (a) at 35 °C (b) and at 75 °C.

**Calculation of proton conductivity:** Using EC-Lab software, the proton conductivity of all the four products was calculated from the respective Nyquist plots after being fitted to the most appropriate equivalent circuit.

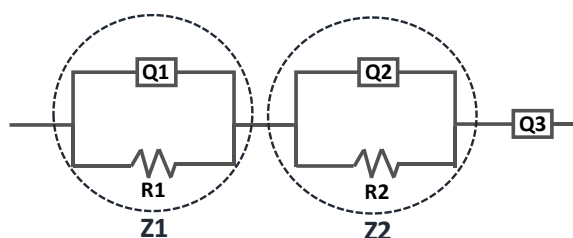

**Fig S26.** Equivalent electrical circuit used for fitting the experimentally obtained Nyquist plots.

Figure S23 shows the equivalent circuit used for fitting the data of these four products. The circuit consists of three major parts, Z1, Z2, and Q3. Z1 corresponds to the pellet impedance and is composed of two elements R1 and Q1. Here R1 accounts for the bulk resistance of the sample pellet, which can be got from the smaller semicircle in the high frequency region of the Nyquist plot. Similarly, R2 accounts for the charge transfer resistance existing between the sample pellet electrolyte and the electrode which is determined from the larger semicircle. Q1, Q2 and Q3 are the constant phase elements, where Q1 and Q2 represents the non-ideal capacitance in bulk and Q3 accounts for the non-ideal capacitance of electrode-electrolyte interface.

Thus, the value of R1, which is in this case refers to the resistance observed during proton conduction, was obtained by fitting the experimentally obtained data points to the equivalent circuit chosen.<sup>3,4</sup>



### Calculation of proton conductivity from R1:

Proton conductivity ( $\sigma$ ) =  $I/AR$

$l$  = Thickness of the pellet

$A$  = Area of cross section of the pellet

$R$  = Resistance

For example,

R1 for **Py-Mo<sub>132</sub>**, at 80 °C and 98% humidity = 14  $\Omega$

Thickness of that corresponding pellet = 0.198 cm

Area of cross section of the pellet = 1.32 cm<sup>2</sup>

Therefore, proton conductivity ( $\sigma$ ) =  $0.198 / (1.32 \times 14) = 1.07 \times 10^{-2} \text{ Scm}^{-1}$

### Calculation of activation energy for proton conduction

Activation energy for proton conductivity is calculated from the proton conductivity values at different temperatures. From the slope of the curve of the plot of  $1000/T$  versus  $\ln(\sigma T)$ , activation energy can be calculated.

For example,

Consider the plot between  $1000/T$  and  $\ln(\sigma T)$  at various temperatures for **Py-Mo<sub>132</sub>**.

The slope of the curve is =  $-2.8 \text{ Scm}^{-1}$

From the Arrhenius equation,  $\sigma T = \sigma_0 \times e^{-E_a/RT}$

Where,  $\sigma$  = conductivity of the sample

$T$  = temperature in the kelvin scale

$E_a$  = Activation energy

$R$  = Ideal gas constant =  $8.63 \times 10^{-5} \text{ eV K}^{-1}$

This equation can be written as

$\ln(\sigma T) = \ln(\sigma_0) - E_a/RT$ , or

$\ln(\sigma T) = \ln(\sigma_0) + (-E_a/1000R \times 1000/T)$

This represents a straight-line plot, and the slope =  $-E_a/1000R$

Therefore, if slope from plot =  $-2.8 \text{ Scm}^{-1}$

Activation energy  $E_a = 2.8 \times 1000 \times 8.63 \times 10^{-5} = 0.24 \text{ eV}$

### Section S2.13. Unit cell packing of $\{\text{Mo}_{132}\}$

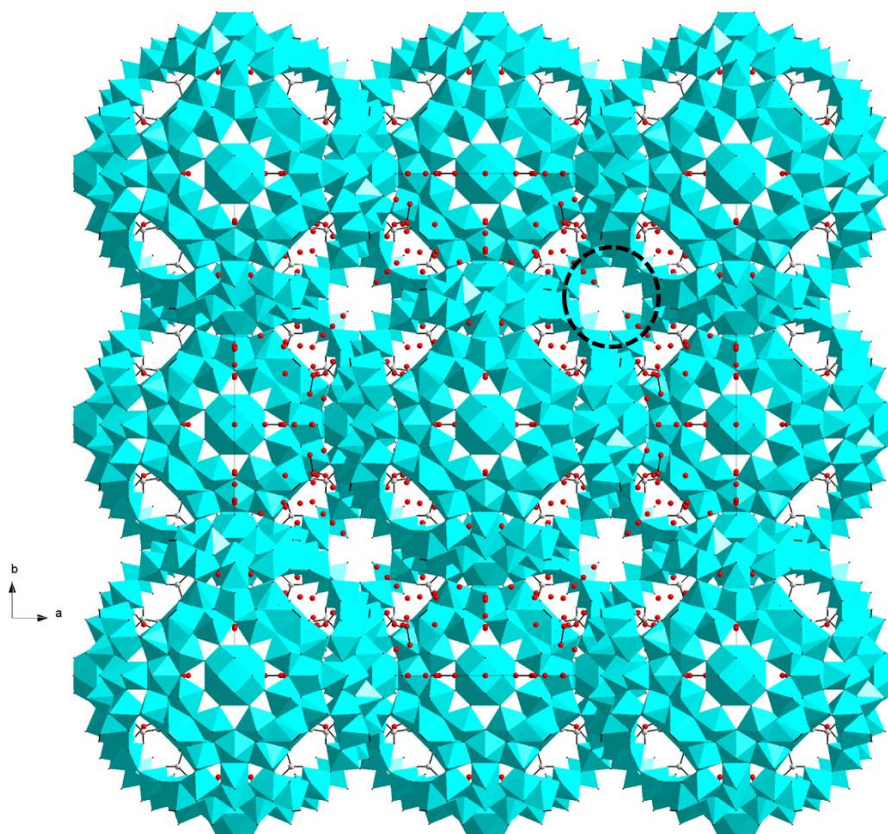

**Fig. S27.** Unit cell packing of  $\{\text{Mo}_{132}\}$  (the black circle shows the void space of 5 Å, which could fit a pyridine molecule but no other organic cations chosen. The crystal packing image was made from the CIF file of parent  $\{\text{Mo}_{132}\}$  - *Angew. Chem. Int. Ed.* 1998, **37**, 3359-3363). We have shown, by PXRD studies and by measuring unit cell parameters of two synthesized ion-exchanged compounds, that all these title compounds crystallize in cubic crystal system.

Section S2.14. Dynamic vapor sorption analysis

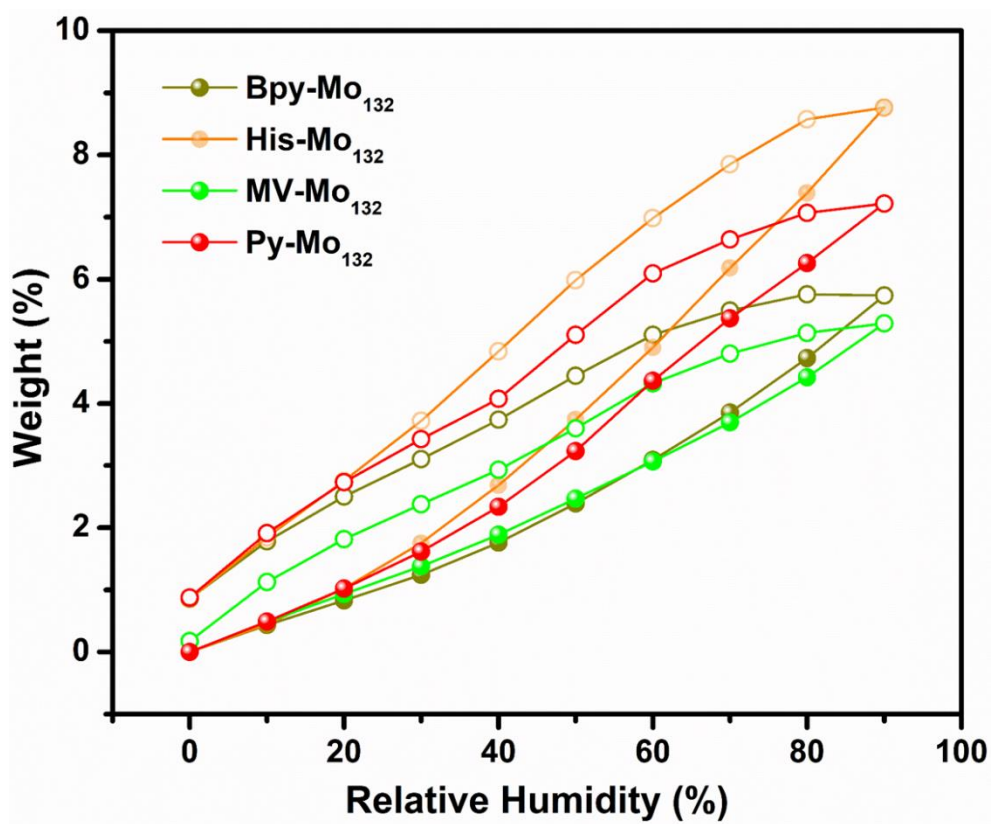

Fig S28. Dynamic vapor sorption isotherms for His-Mo<sub>132</sub>, Py-Mo<sub>132</sub>, Bpy-Mo<sub>132</sub>, and MV-Mo<sub>132</sub>

**Section S2.15. Stability check after impedance measurements: Powder X ray diffraction (PXRD) and infrared spectroscopy (IR)**

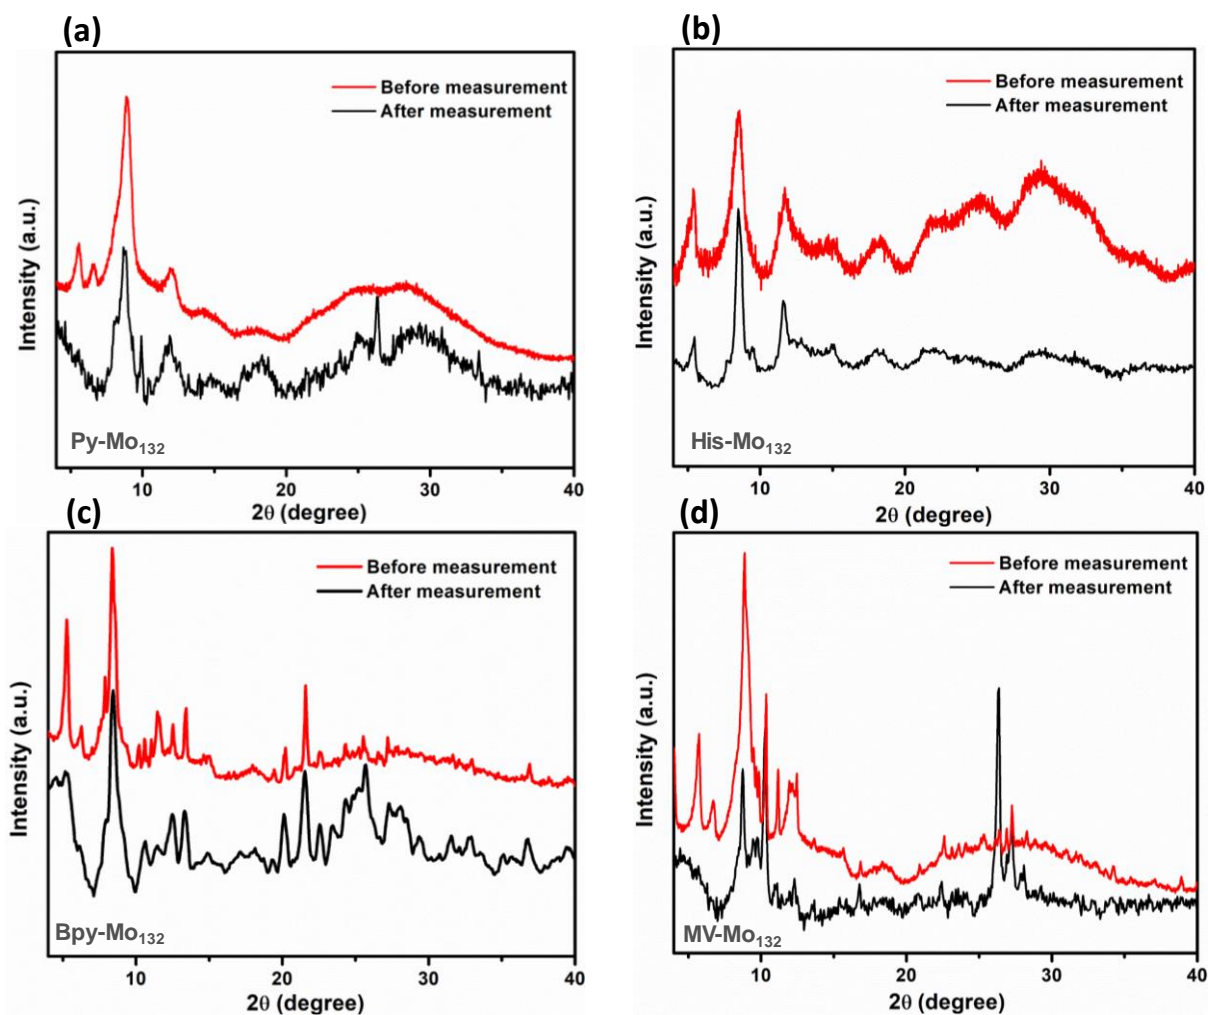

**Fig S29.** PXRD patterns of (a) **Py-Mo<sub>132</sub>** (b) **His-Mo<sub>132</sub>** (c) **Bpy-Mo<sub>132</sub>** and (d) **MV-Mo<sub>132</sub>**, before and after proton conductivity experiments on the sample pellet. The new peak present at  $2\theta$  value of 26 in all the PXRD patterns taken after proton conductivity experiment, is originating from traces of carbon paper present in the sample, prepared by powdering the pellet.

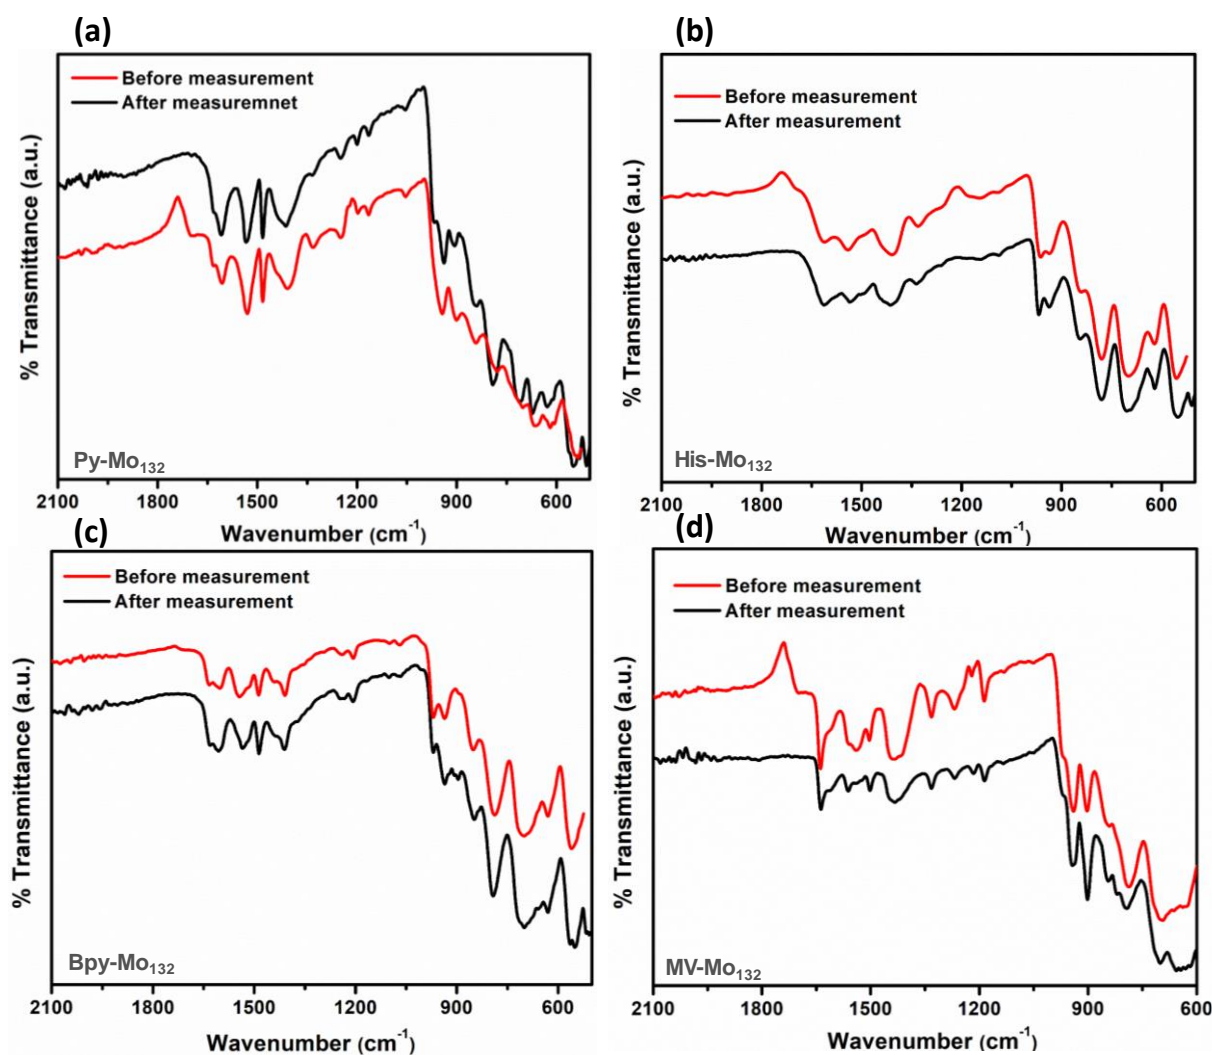

Fig S30. IR spectra of (a) Py-Mo<sub>132</sub> (b) His-Mo<sub>132</sub> (c) Bpy-Mo<sub>132</sub> (d) MV-Mo<sub>132</sub>.

## Section S2.16 Electrical conductivity study

**Experimental setup:** The electrical conductivity measurement for all compounds was done using a two-electrode set up, where 10 mg of each sample was placed in a cylindrical cell at room temperature and 25% humidity. All the samples were ground to a fine powder before placing in the cell. Electric current (DC) was allowed to flow through the sample between the two electrodes, and the resistance was measured using Zahner Zanium electrochemical workstation, operated by Thales software.

The corresponding plots of electrical conductivity measurements are provided.

### Calculation of electrical conductivity:

The electrical conductivity was calculated from the following equations.

$$\sigma = L/AR$$

$$R=V/I$$

$\sigma$  = Electrical conductivity

L = Height of the cylindrical cell containing the sample

A = Surface area of the base of the cylindrical cell

R = Resistance

V = Potential

I = Current

For **Py-Mo<sub>132</sub>**,

L=0.07 cm

A= 0.0408 cm<sup>2</sup>

V=1 V

I = 2.604×10<sup>-7</sup> A

Therefore, R= 1/2.604×10<sup>-7</sup> = 0.384×10<sup>7</sup> Ω.

Now,  $\sigma = 0.07 / 0.04018 \times 0.384 \times 10^7 = 4.5 \times 10^{-7} \text{ Scm}^{-1}$

**Table S11. Electrical conductivities of the four products**

| Sample                      | Current (A)<br>@ 1V    | Resistance (Ω)        | Conductivity<br>(Scm <sup>-1</sup> ) |
|-----------------------------|------------------------|-----------------------|--------------------------------------|
| <b>Py-Mo<sub>132</sub></b>  | 2.604×10 <sup>-7</sup> | 0.384×10 <sup>7</sup> | 4.5×10 <sup>-7</sup>                 |
| <b>His-Mo<sub>132</sub></b> | 2.583×10 <sup>-8</sup> | 0.394×10 <sup>8</sup> | 5.05×10 <sup>-8</sup>                |
| <b>MV-Mo<sub>132</sub></b>  | 2.213×10 <sup>-7</sup> | 0.451×10 <sup>7</sup> | 4.9×10 <sup>-7</sup>                 |
| <b>Bpy-Mo<sub>132</sub></b> | 6.126×10 <sup>-8</sup> | 0.16×10 <sup>8</sup>  | 1.7×10 <sup>-7</sup>                 |



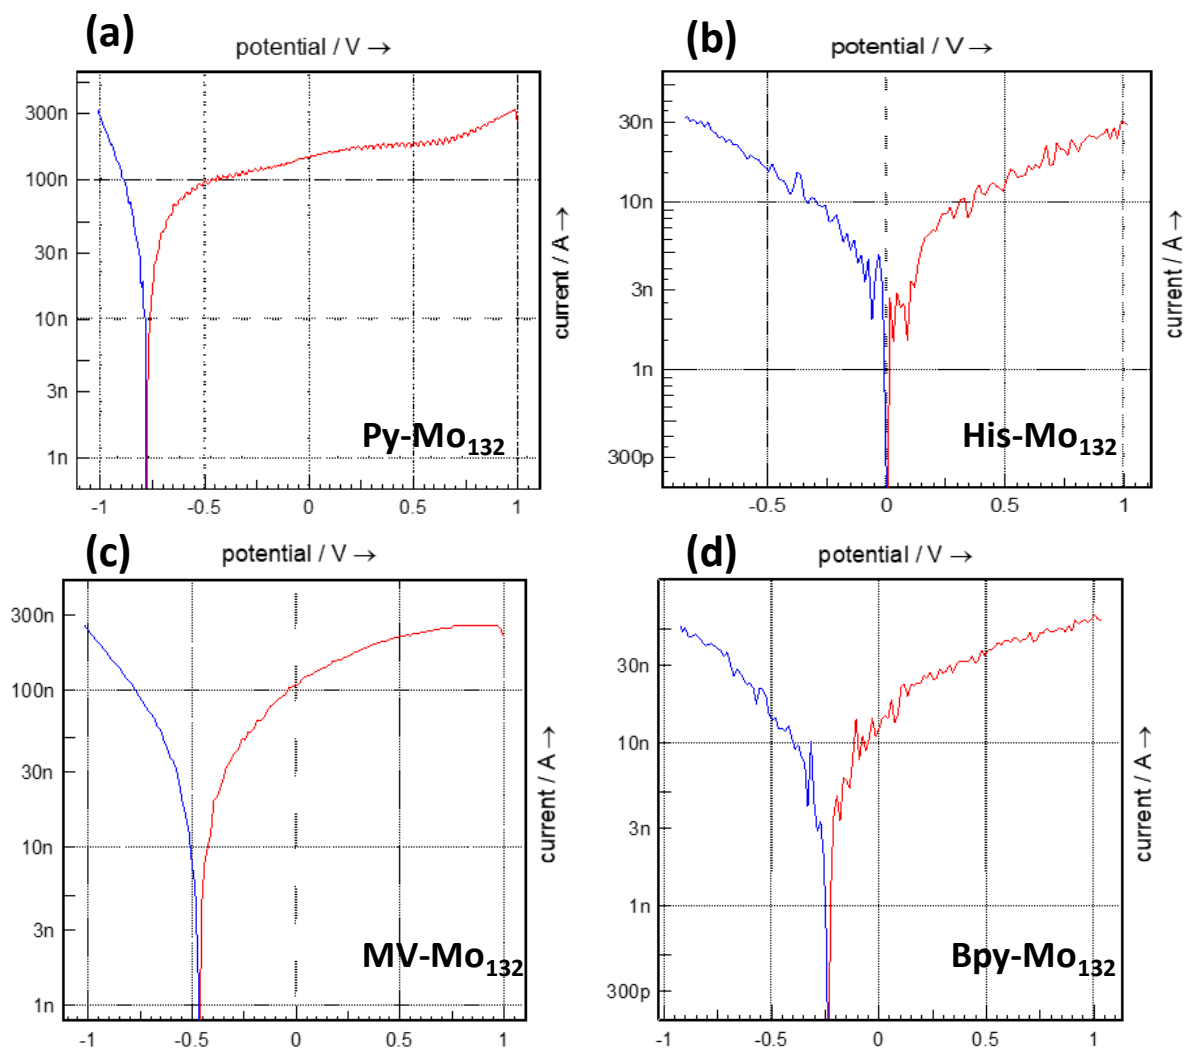

**Fig S31.** Electrical conductivity measurement (potential vs current) of (a) **Py-Mo<sub>132</sub>**, (b) **His-Mo<sub>132</sub>**, (c) **MV-Mo<sub>132</sub>**, and (d) **Bpy-Mo<sub>132</sub>**.

## Section S2.17 Proton conductivity of giant POM-based proton conductors

**Table S12. Proton conductivity of giant POM based proton conductors**

| SI No: | Compound                                                                                                                                                                                                                                                                        | Conductivity          | Conditions       | Reference        |
|--------|---------------------------------------------------------------------------------------------------------------------------------------------------------------------------------------------------------------------------------------------------------------------------------|-----------------------|------------------|------------------|
| 1      | TBAMo <sub>132</sub>                                                                                                                                                                                                                                                            | $1.8 \times 10^{-5}$  | 60°C and 98% RH  | 6                |
| 2      | <b>Bpy-Mo<sub>132</sub></b>                                                                                                                                                                                                                                                     | $1.17 \times 10^{-3}$ | 80°C and 98% RH  | <b>This work</b> |
| 3      | Mo <sub>72</sub> Fe <sub>30</sub> O <sub>252</sub> (CH <sub>3</sub> COO) <sub>12</sub> {Mo <sub>2</sub> O <sub>7</sub> (H <sub>2</sub> O)} <sub>2</sub> {H <sub>2</sub> Mo <sub>2</sub> O <sub>8</sub> (H <sub>2</sub> O)}(H <sub>2</sub> O) <sub>91</sub> ·150H <sub>2</sub> O | $1.85 \times 10^{-3}$ | 57°C and 50% RH  | 7                |
| 4      | ILMo <sub>132</sub>                                                                                                                                                                                                                                                             | $3.28 \times 10^{-3}$ | 60°C and 98% RH  | 6                |
| 5      | <b>MV-Mo<sub>132</sub></b>                                                                                                                                                                                                                                                      | $4.17 \times 10^{-3}$ | 80°C and 98% RH  | <b>This work</b> |
| 6      | <b>His-Mo<sub>132</sub></b>                                                                                                                                                                                                                                                     | $5.2 \times 10^{-3}$  | 60°C and 98% RH  | <b>This work</b> |
| 7      | {(NH <sub>4</sub> ) <sub>13</sub> [Mo <sub>28</sub> <sup>V</sup> Mo <sub>126</sub> <sup>VI</sup> O <sub>456</sub> H <sub>34</sub> (H <sub>2</sub> O) <sub>70</sub> ]Cl <sub>17</sub> (ClO <sub>4</sub> ) <sub>14</sub> ·mH <sub>2</sub> O}                                      | $1.1 \times 10^{-2}$  | 22°C and 100% RH | 8                |
| 8      | <b>Py-Mo<sub>132</sub></b>                                                                                                                                                                                                                                                      | $1.1 \times 10^{-2}$  | 80 °C and 98% RH | <b>This work</b> |
| 9      | HMeImMo <sub>132</sub>                                                                                                                                                                                                                                                          | $2.13 \times 10^{-2}$ | 60°C and 98% RH  | 6                |
| 10.    | HImMo <sub>132</sub>                                                                                                                                                                                                                                                            | $4.98 \times 10^{-2}$ | 60°C and 98% RH  | 6                |
| 11.    | (NH <sub>4</sub> ) <sub>21</sub> H <sup>+</sup> <sub>59-2x</sub> [Mo <sub>180</sub> <sup>V</sup> Mo <sub>60</sub> <sup>VI</sup> (OH) <sub>600</sub> O <sub>620-x</sub> (SO <sub>3</sub> ) <sub>20-x</sub> (SO <sub>4</sub> ) <sub>x</sub> ]·ca337H <sub>2</sub> O               | $1.03 \times 10^{-1}$ | 80°C and 98% RH  | 9                |

## REFERENCES

- (1) A. Müller, E. Krickemeyer, H. Bögge, M. Schmidtman and F. Peters, *Angew. Chem. Int. Ed.* 1998, **37**, 3359-3363.
- (2) M.R. Geraskina, A.S. Dutton, M. J. Juetten, S.A. Wood and A.H. Winter, *Angew. Chem., Int. Ed.* 2017, **56**, 9435-9439.
- (3) S. Mukhopadhyay, J. Debgupta, C. Singh, R. Sarkar, O. Basu, S.K. Das, *Appl. Mater. Interfaces* 2019, **11**, 13423–13432.
- (4) O. Basu, S. Mukhopadhyay, S. Laha and S.K. Das, *Chem. Mater.* 2022, **34**, 6734–6743.
- (5) Y. Zhou, Z. Shi, L. Zhang, S. Hassan and N. Qu, *Appl. Phys. A* 2013, **113**, 563–568.
- (6) W. J. Liu, L. Z. Dong, R. H. Li, Y. J. Chen, S. N. Sun, S. L. Li and Y. Q. ACS *Appl. Mater. Interfaces* 2019, **11**, 7030–7036.
- (7) K. Tandekar, C. Singh, and S. Supriya, *Eur J Inorg Chem* 2021, 734–739.
- (8) H. Y. Wang, S. R. Li, X. Wang, L. S. Long, X. J. Kong and L. S. Zheng, *Sci. China Chem.* 2021, **64**, 959–963.
- (9) J. Lin, N. Li, S. Yang, M. Jia, J. Liu, X. M. Li, L. An, Q. Tian, L. Z. Dong and Y. Q. Lan, *J. Am. Chem. Soc.* 2020, **142**, 13982–13988.
